# Supplementary material
Source: PubMed Central journal article supplement (PMC4433456)
Supplement: supp_WNL.0000000000001560_Coinvestigators.pdf [file supp_WNL.0000000000001560_Coinvestigators.pdf]

## **Coinvestigators:**

Chung-Chou H. Chang, PhD (University of Pittsburgh School of Medicine and University of Pittsburgh Graduate School of Public Health, Veterans Aging Cohort Study Cardiovascular Core, Lead Statistician); Kaku So-Armah, BS (Yale University School of Medicine, Veterans Aging Cohort Study Cardiovascular Core, Investigator); Amy C. Justice, MD, PhD (Yale University School of Medicine and VA Connecticut Health Care System, West Haven Veterans Administration Medical Center, Veterans Aging Cohort Study, Consortium Principal Investigator); Elaine Hylek, MD, MPH (Boston Medical Center, Veterans Aging Cohort Study Cardiovascular Core, Investigator); Melissa Skanderson, MS (VA Connecticut Health Care System, West Haven Veterans Administration Medical Center, Veterans Aging Cohort Study, Programmer); Kathleen McGinnis, MS (VA Connecticut Health Care System, West Haven Veterans Administration Medical Center, Veterans Aging Cohort Study, Statistician); Lewis H. Kuller, MD, Dr. PH (University of Pittsburgh Graduate School of Public Health, Veterans Aging Cohort Study Cardiovascular Core, Investigator); Kevin L. Kraemer, MD, MSc (University of Pittsburgh School of Medicine, Veterans Aging Cohort Study Cardiovascular Core, Investigator); David Rimland, MD (Emory University School of Medicine and Atlanta Veterans Administration Medical Center, Veterans Aging Cohort Study Cardiovascular Core, Investigator); Matthew Bidwell Goetz, MD (David Geffen School of Medicine at UCLA and the VA Greater Los Angeles Health Care System, Veterans Aging Cohort Study Cardiovascular Core, Investigator); Adeel A. Butt, MD, MS (University of Pittsburgh School of Medicine, VA Pittsburgh Health Care System, Veterans Aging Cohort Study Cardiovascular Core, Investigator); Maria C. Rodriguez Barradas, MD (Michael E. DeBakey Veterans Administration Medical Center and Baylor College of Medicine, Veterans Aging Cohort Study Cardiovascular Core, Investigator); Cynthia Gibert, MD (Washington DC Veterans Administration Medical Center and George Washington University School of Medicine, Veterans Aging Cohort Study Cardiovascular Core, Investigator); David Leaf, MD, MPH (David Geffen School of Medicine at UCLA and the VA Greater Los Angeles Health Care System, Veterans Aging Cohort Study Cardiovascular Core, Investigator); Sheldon T. Brown, MD (James J. Peters VA, Bronx, NY, Mount Sinai School of Medicine, Veterans Aging Cohort Study Cardiovascular Core, Investigator); Jeffrey Samet, MD, MA, MPH (Boston University School of Medicine, Veterans Aging Cohort Study Cardiovascular Core, Investigator); Lewis Kazis, PhD: (Center for the Assessment of Pharmaceutical Practices, Department of Health Policy and Management Boston University School of Public Health, Center for Health Quality, Outcomes and Economic Research, Veterans Administration Medical Center, Veterans Aging Cohort Study Cardiovascular Core, Investigator); Kendall Bryant, PhD: (National Institute on Alcohol Abuse and Alcoholism, Veterans Aging Cohort Study Cardiovascular Core, Investigator); Matthew S. Freiberg, MD, MSc: (Vanderbilt University School of Medicine, Veterans Aging Cohort Study Cardiovascular Core, Chair)
